# Supplementary material for: New ab initio potential energy surface of NaFH (1A′) system and quantum dynamics studies for the Na + HF (v, j) → NaF + H reaction
Source: Royal Society of Chemistry journal article supplement (doi:10.1039/d3ra01885g), 2023-01-01
Supplement: d3ra01885g1.pdf [file d3ra01885g1.pdf]

**Supplementary Information**

**New *ab initio* potential energy surface of NaFH (1A') system and  
quantum dynamics studies for the Na + HF ( $v, j$ )  $\rightarrow$  NaF + H reaction**

Wei Yan,\*<sup>a</sup> Rui Shan Tan,<sup>a</sup> and Shi Ying Lin<sup>b</sup>

<sup>a</sup>*School of Science, Shandong Jianzhu University, Jinan 250101, China*

<sup>b</sup>*School of Physics, Shandong University, Jinan 250100, China*

\*Corresponding author: Wei Yan

E-mail address: yanwei19@sdjzu.edu.cn (W. Yan).

## Computational methods: Quantum wave packet calculation

In our calculations, the Hamiltonian and wavepacket are expressed in the reactant (Na + HF) body-fixed Jacobi coordinates  $(R, r, \theta)$ , which are the distance between Na and the center-of-mass of HF ( $R$ ), the length of the HF internuclear distance ( $r$ ) and the angle enclosed by  $R$  and  $r$  ( $\theta$ ), respectively. The  $\vec{R}$  vector is also coincided with the body-fixed  $z$  axis. The Hamiltonian is expressed in atomic units as

$$\hat{H} = -\frac{1}{2\mu_R} \frac{\partial^2}{\partial R^2} - \frac{1}{2\mu_r} \frac{\partial^2}{\partial r^2} + \frac{\hat{j}^2}{2\mu_r r^2} + \frac{\hat{l}^2}{2\mu_R R^2} + V(R, r, \theta) \quad (1)$$

where  $\mu_R$  and  $\mu_r$  are the corresponding reduced masses.  $\hat{j}$  donates the diatomic rotational angular momentum operator and  $\hat{l}$  donates the orbital angular momentum operator. The operator  $\hat{l}^2$  can be further expressed as

$$\hat{l}^2 \equiv (\hat{J} - \hat{j})^2 = \hat{J}^2 + \hat{j}^2 - 2\hat{J}_z \hat{j}_z - \hat{J}_+ \hat{j}_- - \hat{J}_- \hat{j}_+ \quad (2)$$

where  $\hat{J}$  is the total angular momentum operator.  $\hat{J}_z$  and  $\hat{j}_z$  are their corresponding projections onto the body-fixed  $z$  axis and  $\hat{J}_+$  ( $\hat{J}_-$ ) and  $\hat{j}_+$  ( $\hat{j}_-$ ) are the corresponding raising (lowering) operators which represent the Coriolis coupling [1,2].  $V(R, r, \theta)$  is obtained from our fitted potential surface.

We use a discrete variable representation (DVR) for the radial coordinates and a finite basis representation (FBR) for the angular coordinates [3]. We define equidistant grids labeled by  $\chi_1$  and  $\chi_2$  for  $R$  and  $r$  and use the following parity ( $p$ ) - adapted BF-FBR for  $\theta$  [4].

$$|j\Omega; Jp\rangle = (2 + 2\delta_{\Omega,0})^{-1/2} (|J\Omega\rangle |j\Omega\rangle + p(-1)^J |J-\Omega\rangle |j-\Omega\rangle) \quad (3)$$

where  $|j\Omega\rangle \equiv \Theta_{j\Omega}(\gamma, 0)$  are normalized associate Legendre functions with the Condon-Shortley phase convention [5]. The overall rotation is represented by  $|J\Omega\rangle = \sqrt{(2J+1)/8\pi^2} D_{\Omega,0}^{J*}$  where  $D_{\Omega,0}^{J*}$  is the Wigner rotation matrix [6]. In the body-fixed frame,  $\Omega$  is the projection of  $J$  and  $j$  onto  $z$  axis and restricted to be non-negative. Thus, the wavepacket can be expressed as

$$|\psi^{Jp}\rangle = \sum_{\chi_1 \chi_2 j \Omega} \Psi_{\chi_1 \chi_2 j \Omega}^{Jp} |\chi_1\rangle |\chi_2\rangle |j\Omega; Jp\rangle \quad (4)$$

In the dynamic calculations, the wavepacket is propagated using the modified Chebyshev recursion relation [7-9]

$$|\psi_{k+1}\rangle = D(2H_{scaled} |\psi_k\rangle - D |\psi_{k-1}\rangle), \quad k \geq 1 \quad \text{and} \quad |\psi_1\rangle = D\hat{H}_{scaled} |\psi_0\rangle \quad (5)$$

The scaled Hamiltonian is defined by the spectral width and mean of the Hamiltonian,  $\hat{H}_{scaled} = (\hat{H} - H^+) / H^-$ , where  $H^\pm = (H_{max} \pm H_{min}) / 2$  with  $H_{max}$ ,  $H_{min}$  as the upper and lower spectral bound [10], respectively. The wavepacket is absorbed by damping function  $D$  at the edges of grids to enforce the outgoing boundary condition

$$D(x) = \begin{cases} 1, & \text{for } x \leq x_d \\ e^{-d_x(x-x_d)^2}, & \text{for } x > x_d \end{cases} \quad x = R \text{ or } r \quad (6)$$

The initial wavepacket is constructed as a product of a one-dimensional Gaussian-shaped wavepacket along  $R$ , a well-defined rovibrational eigenfunction of reactant HF and a space-fixed (SF) angular momentum eigenstate in the coupled representation.

$$|\psi_0\rangle = N e^{-(R-R_0)^2/2\delta^2} \cos(k_0 R) |\varphi_{v_i j_i}\rangle |JM j_i l_i\rangle \quad (7)$$

where  $k_0$ ,  $R_0$ ,  $\delta$  and  $N$  are the mean momentum, mean position, width, and normalization constant, respectively.

The actions of the first two kinetic energy operators (KEOs) in eq 1 are performed by fast sine Fourier transform. The third KEO term is diagonal in the BF-FBR

$$\langle j'\Omega'; Jp | \hat{j}^2 | j\Omega; Jp \rangle = j(j+1) \delta_{j',j} \delta_{\Omega',\Omega} \quad (8)$$

The fourth KEO term is tri-diagonal in the BF-FBR and we can also calculate straightforward

$$\begin{aligned} \langle j'\Omega'; Jp | \hat{l}^2 | j\Omega; Jp \rangle &= [J(J+1) + j(j+1) - 2\Omega^2] \delta_{j',j} \delta_{\Omega',\Omega} - \\ & \left[ (1 + \delta_{\Omega',0})(1 + \delta_{\Omega,0}) \right]^{-1/2} \left\{ \lambda_{j\Omega}^+ \lambda_{j\Omega}^+ \delta_{\Omega',\Omega+1} + \lambda_{j\Omega}^- \lambda_{j\Omega}^- \left[ \delta_{\Omega',\Omega-1} + p(-1)^j \delta_{\Omega',-\Omega+1} \right] \right\} \delta_{j',j} \end{aligned} \quad (9)$$

where  $\lambda_{jm}^\pm = \sqrt{j(j+1) - m(m \pm 1)}$ .

Herein, we first transform the wavepacket in the BF-FBR  $|j\Omega; Jp\rangle$  to the SF-FBR  $|jl; Jp\rangle$  using the formula below [11] because that the spectral range is unmanageable

when the corresponding rotational energy constant becomes very large with  $R \rightarrow 0$  in the BF frame.

$$|j\Omega; Jp\rangle = \sum_l (-1)^{j-l+\Omega} \sqrt{(2-\delta_{\Omega,0})(2l+1)} \begin{pmatrix} j & l & J \\ \Omega & 0 & -\Omega \end{pmatrix} |jl; Jp\rangle \quad (10)$$

where  $\begin{pmatrix} l \\ l \end{pmatrix}$  is the 3-j symbol. We can control the spectral range conveniently by truncating the rotational energy as the fourth KEO is diagonal in the SF-FBR. The wavepacket is then transformed back to the original BF-FBR after this.

The action of the fifth term in eq 1 (potential energy operator) is diagonal at DVR points. In this case, the angular DVR is defined by the angular Gauss-Legendre quadrature points associated with rotational basis. We transform the wavepacket from the FBR to angular DVR through a pseudospectral transform [12,13]

$$T_{j\alpha}^{(\Omega)} = \sqrt{\omega_\alpha} \Theta_{j\Omega}(\gamma_\alpha) \quad (11)$$

where  $\alpha$  is the index of the Gauss-Legendre quadrature points for the Jacobi angular coordinate and  $\omega_\alpha$  is the corresponding weight.

The initial-state-selected reaction probability is extract by flux method using the following equation [14,15]

$$P(E) = \frac{1}{2\pi\mu_r |a_i(E)|^2 (H^-)^2 \sin^2 \theta} \times \text{Im} \left\langle \sum_k (2-\delta_{k0}) e^{-ik\theta} \psi_k \left| \sum_{k'} (2-\delta_{k'0}) e^{-ik'\theta} \left[ \delta(r-r_f) \frac{\partial}{\partial r} \psi_{k'} \right] \right. \right\rangle \quad (12)$$

$r_f$  defines the dividing surface in the product channel where we calculate the outgoing flux.  $a_i(E) = \langle i\sqrt{\mu_R k_i / 2\pi R h_\Lambda^{(2)}}(k_i R) | g(R) \rangle$  is the energy amplitude [16], where  $h_\Lambda^{(2)}(k_i R)$  is the spherical Hankel function of the second kind.

The integral cross section (ICS) is obtained by partial wave summation over  $J$  and an average over  $l$  ( $l \in [|J-j_i|, J+j_i]$ )

$$\sigma_{v_i j_i}(E) = \frac{f\pi}{(2j_i+1)k_{v_i j_i}^2} \sum_{J, l_i} (2J+1) P_{v_i j_i l_i}^J(E) \quad (13)$$

where  $k_{v_i j_i}^2 = 2\mu_R E_c$ ,  $E_c$  is the collision energy and  $f$  is the electronic degeneracy factor

which is set to 1 for this reaction.

The rate constant is obtained by integrating of the ICS over the collision energy with the Boltzmann weight

$$k_{v_i j_i}(T) = \frac{1}{k_B T} \left( \frac{8}{\pi \mu_R k_B T} \right)^{1/2} \int_0^\infty \sigma_{v_i j_i}(E_c) e^{-E_c/k_B T} E_c dE_c \quad (14)$$

where  $k_B$  is the Boltzmann constant and  $T$  is temperature.

## References

- [1] R.T. Pack, *J. Chem. Phys.*, 1974, **60**, 633-639.
- [2] P. McGuire and D.J. Kouri, *J. Chem. Phys.*, 1974, **60**, 2488-2499.
- [3] J.C. Light and T. Carrington, *Adv. Chem. Phys.*, 2007, **114**, 263-310.
- [4] S.Y. Lin and H. Guo, *J. Phys. Chem. A*, 2004, **108**, 2141-2148.
- [5] E.U. Condon and G.H. Shortley, *The Theory of Atomic Spectra*, Cambridge: London, 1964.
- [6] R.N. Zare, *Angular Momentum*, Wiley: New York, 1988.
- [7] H. Guo, *Chebyshev Propagation and Applications to Scattering Problems*. In *Theory of Chemical Reaction Dynamics*, Springer Netherlands, 2005, 217-229.
- [8] V.A. Mandelshtam and H.S. Taylor, *J. Chem. Phys.*, 1995, **102**, 7390-7399.
- [9] V.A. Mandelshtam and H.S. Taylor, *J. Chem. Phys.*, 1995, **103**, 2903-2907.
- [10] H. Tal-Ezer and R. Kosloff, *J. Chem. Phys.*, 1984, **81**, 3967-3971.
- [11] J.Z.H. Zhang, *Theory and Application of Quantum Molecular Dynamics*, World Scientific: Singapore, 1999.
- [12] G.C. Corey and D. Lemoine, *J. Chem. Phys.*, 1992, **97**, 4115-4126.
- [13] G.C. Corey and J.W. Tromp, *J. Chem. Phys.*, 1995, **103**, 1812-1820.
- [14] S.Y. Lin and H. Guo, *J. Chem. Phys.*, 2003, **119**, 11602-11608.
- [15] A.J.H.M. Meijer, E.M. Goldfield, S.K. Gray and G.G. Balint-Kurti, *Chem. Phys. Lett.*, 1998, **293**, 270-276.
- [16] S.C. Althorpe, *J. Chem. Phys.*, 2001, **114**, 1601-1616.

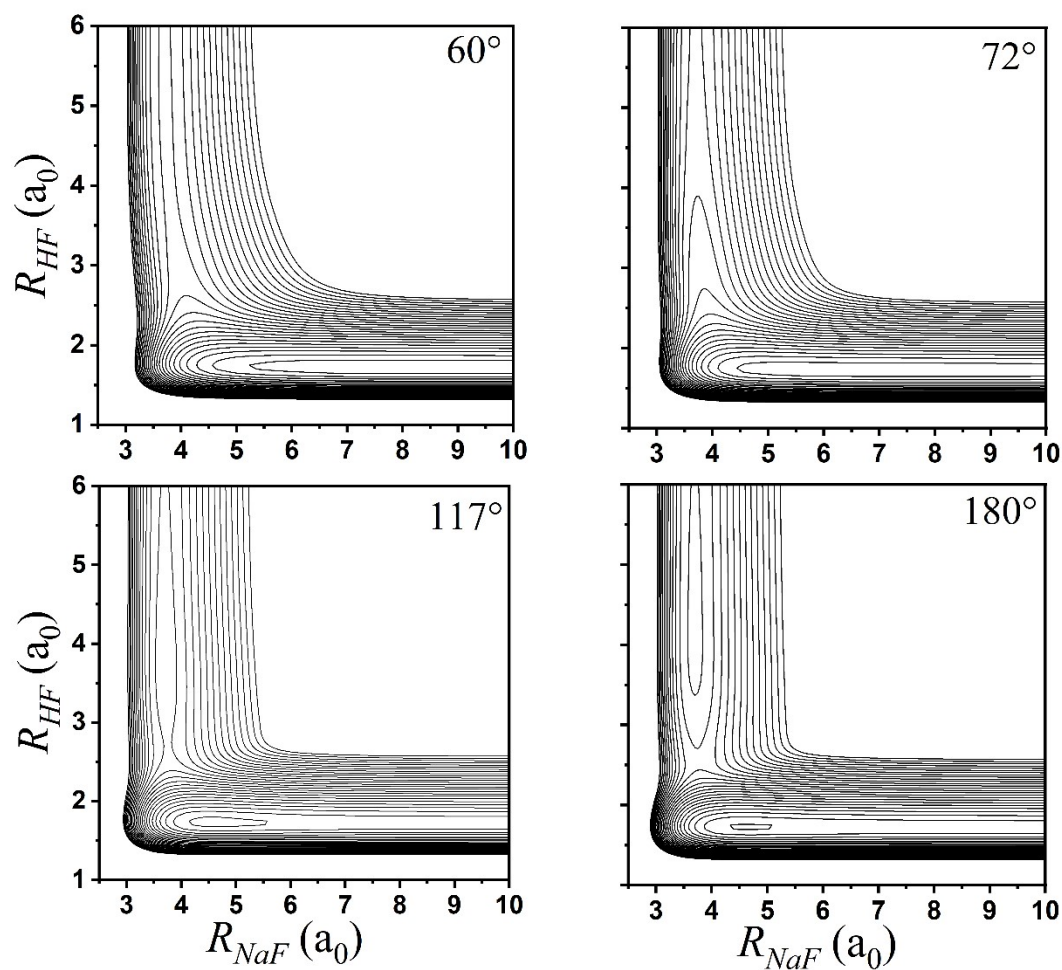

Fig. S1 The contour plots of potential energy surfaces in terms of Na-F bond length (x-axis) and H-F bond length (y-axis) for several fixed bond angles,  $\theta_{NaFH} = 60^\circ, 72^\circ, 117^\circ, 180^\circ$ . Isoenergetic contours are drawn every 0.1 eV from 0 to 2.5 eV with respect to the energy of the global minimum of the PES.

Table S1. The eigen-energies of the  $v = 0-5, j = 0-7$  rovibrational states of the reactant and product. All the energies are given in eV.

| <b>(<math>v, j</math>)</b> | <b>HF</b> | <b>NaF</b> | <b>(<math>v, j</math>)</b> | <b>HF</b> | <b>NaF</b> |
|----------------------------|-----------|------------|----------------------------|-----------|------------|
| (0, 0)                     | 0.2555    | 1.2773     | (3, 0)                     | 1.6892    | 1.4648     |
| (0, 1)                     | 0.2606    | 1.2774     | (3, 1)                     | 1.6938    | 1.4649     |
| (0, 2)                     | 0.2709    | 1.2776     | (3, 2)                     | 1.7030    | 1.4651     |
| (0, 3)                     | 0.2862    | 1.2779     | (3, 3)                     | 1.7167    | 1.4654     |
| (0, 4)                     | 0.3067    | 1.2784     | (3, 4)                     | 1.7351    | 1.4658     |
| (0, 5)                     | 0.3323    | 1.2789     | (3, 5)                     | 1.7580    | 1.4663     |
| (0, 6)                     | 0.3629    | 1.2795     | (3, 6)                     | 1.7853    | 1.4670     |
| (0, 7)                     | 0.3985    | 1.2802     | (3, 7)                     | 1.8172    | 1.4677     |
| (1, 0)                     | 0.7582    | 1.3408     | (4, 0)                     | 2.1204    | 1.5256     |
| (1, 1)                     | 0.7631    | 1.3409     | (4, 1)                     | 2.1248    | 1.5257     |
| (1, 2)                     | 0.7730    | 1.3411     | (4, 2)                     | 2.1337    | 1.5259     |
| (1, 3)                     | 0.7877    | 1.3414     | (4, 3)                     | 2.1470    | 1.5262     |
| (1, 4)                     | 0.8073    | 1.3418     | (4, 4)                     | 2.1647    | 1.5266     |
| (1, 5)                     | 0.8318    | 1.3423     | (4, 5)                     | 2.1867    | 1.5271     |
| (1, 6)                     | 0.8611    | 1.3430     | (4, 6)                     | 2.2131    | 1.5277     |
| (1, 7)                     | 0.8953    | 1.3437     | (4, 7)                     | 2.2439    | 1.5284     |
| (2, 0)                     | 1.2360    | 1.4032     | (5, 0)                     | 2.5316    | 1.5855     |
| (2, 1)                     | 1.2408    | 1.4033     | (5, 1)                     | 2.5358    | 1.5856     |
| (2, 2)                     | 1.2503    | 1.4035     | (5, 2)                     | 2.5444    | 1.5858     |
| (2, 3)                     | 1.2646    | 1.4039     | (5, 3)                     | 2.5572    | 1.5861     |
| (2, 4)                     | 1.2835    | 1.4043     | (5, 4)                     | 2.5742    | 1.5865     |
| (2, 5)                     | 1.3072    | 1.4048     | (5, 5)                     | 2.5954    | 1.5870     |
| (2, 6)                     | 1.3355    | 1.4054     | (5, 6)                     | 2.6209    | 1.5876     |
| (2, 7)                     | 1.3685    | 1.4061     | (5, 7)                     | 2.6504    | 1.5883     |
